# Supplementary material for: Aminophenol isomers unraveled by conformer-specific far-IR action spectroscopy
Source: Royal Society of Chemistry journal article supplement (doi:10.1039/c5cp07426f), 2016-01-01
Supplement: c5cp07426f1.pdf [file c5cp07426f1.pdf]

Supplementary information of the paper

## Aminophenol isomers unraveled by conformer-specific far-IR action spectroscopy

Vasyl Yatsyna<sup>a,b</sup>, Daniël J. Bakker<sup>b</sup>, Raimund Feifel<sup>a</sup>, Anouk M. Rijs<sup>\*b</sup>, and Vitali Zhaunerchyk<sup>\*a</sup>

<sup>a</sup> *University of Gothenburg, Department of Physics, 412 96 Gotheburg, Sweden. Tel: +46317869150; E-mail: [vitali.zhaunerchyk@physics.gu.se](mailto:vitali.zhaunerchyk@physics.gu.se)*

<sup>b</sup> *Radboud University, Institute for Molecules and Materials, FELIX Laboratory, Toernooiveld 7-c, 6525 ED Nijmegen, The Netherlands. Tel: +31243653940; E-mail: [a.rijs@science.ru.nl](mailto:a.rijs@science.ru.nl)*

### Table of contents:

Table S1. The experimental and calculated (B3LYP/aug-pc2) wavenumbers of vibrational transitions of 4-aminophenol in the range of 220-800 cm<sup>-1</sup>.

Table S2. The experimental and calculated (B3LYP/aug-pc2) wavenumbers of vibrational transitions of *trans* 2-aminophenol in the range of 220-800 cm<sup>-1</sup>.

Table S3. The experimental and calculated (B3LYP/aug-pc2) wavenumbers of vibrational transitions of *trans* 3-aminophenol in the range of 220-800 cm<sup>-1</sup>.

Table S4. The experimental and calculated (B3LYP/aug-pc2) wavenumbers of vibrational transitions of *cis* 3-aminophenol in the range of 220-800 cm<sup>-1</sup>.

Fig. FS1. Comparison between the accuracy of calculated fundamental transitions in the high wavenumber region (800-4000 cm<sup>-1</sup>) with respect to experimental data, achieved by different GGA and hybrid functionals with 6-311+G(d,p) basis set.

**Table S1.** The experimental and calculated wavenumbers of vibrational transitions of 4-aminophenol in the range of 220-800  $\text{cm}^{-1}$ . The theoretical results were obtained with B3LYP functional and aug-pc-2 basis set, within harmonic and anharmonic VPT2 [1] approaches. The assignments in bold are given according to Varsaniy's notation [2]. List of abbreviations used: i.p. – in plane, o.p. – out of plane.

| Mode  | Assignment                            | Experiment                     |                       | B3LYP/aug-pc-2                        |                                         |                                    | Potential Energy Distribution                           |
|-------|---------------------------------------|--------------------------------|-----------------------|---------------------------------------|-----------------------------------------|------------------------------------|---------------------------------------------------------|
|       |                                       | $\nu_{exp}$ , $\text{cm}^{-1}$ | Relative Intensity, % | harmonic wavenumber, $\text{cm}^{-1}$ | anharmonic wavenumber, $\text{cm}^{-1}$ | $I_{harm}$ , $\text{km/mol}^{***}$ |                                                         |
| 26(1) | C-H o.p. wagging, <b>10a</b>          | 792.0                          | 58.8                  | 810.0                                 | 796.1                                   | 5.9                                | HCCC torsion (87%)                                      |
| 27(1) | C-C-C i.p. bending, <b>12</b>         | 759.5                          | 100.0                 | 773.0                                 | 757.4                                   | 16.8                               | CCC bend i.p. (36%), OC stretch (16%), CC stretch (11%) |
|       | Comb. 33(1)+36(1)*                    | 735.0                          | 21.3                  | 768.8                                 | 767.3                                   | 1.1                                |                                                         |
|       | NH <sub>2</sub> wagging overtone 0-3  | 711.0                          | 37.5                  |                                       |                                         |                                    |                                                         |
| 28(1) | Ring puckering, <b>4</b>              | 676.5                          | 56.3                  | 727.3                                 | 712.1                                   | 5.8                                | CCCC, CCCN o.p. torsion (67%)                           |
| 29(1) | C-C-C i.p. bending, <b>6b</b>         | 645.5                          | 6.3                   | 662.2                                 | 654.8                                   | 0.3                                | CCC, CCO, CCN bend i.p. (79%), CC stretch (16%)         |
|       | Comb. 32(1)+30(1)***                  | 532.0                          | 22.5                  |                                       |                                         |                                    |                                                         |
| 30(1) | NH <sub>2</sub> wagging fundamental** | -                              | -                     | 616.2                                 | 484.8                                   | 268.3                              | HNCC torsion o.p. (73%), HNH bend (11%)                 |
| 31(1) | C-C-C o.p. bending, <b>16b</b>        | 502.0                          | 81.3                  | 517.7                                 | 506.0                                   | 56.7                               | NCCC, OCCC bend o.p. (82%)                              |
|       | OH rock overtone 0-2                  | 478.0                          | 42.5                  |                                       |                                         |                                    |                                                         |
| 32(1) | C-C-C i.p. bending, <b>6a</b>         | 472.0                          | 12.5                  | 474.4                                 | 469.4                                   | 0.3                                | CCC bend i.p. (70%), CC stretch (16%)                   |
|       | NH <sub>2</sub> wagging overtone 0-2  | 467.0                          | 42.5                  |                                       |                                         |                                    |                                                         |
|       | NH <sub>2</sub> torsion overtone 0-2  | 462.0                          | 53.8                  |                                       |                                         |                                    |                                                         |
| 33(1) | C-O, C-N i.p. bending, <b>9b</b>      | 370.0                          | 30.0                  | 439.3                                 | 437.9                                   | 6.5                                | CCO, CCN bend i.p. (91%)                                |
| 34(1) | C-C-C o.p. bending, <b>16a</b>        | 422.0                          | 45.0                  | 426.5                                 | 418.0                                   | 1.3                                | CCCC torsion o.p. (83%)                                 |
| 35(1) | C-O, C-N o.p. bending, <b>10b</b>     | 350.0                          | 23.8                  | 358.2                                 | 351.3                                   | 7.0                                | CCCN torsion o.p. (88%), CCCC torsion o.p. (13%)        |
| 36(1) | C-O, C-N i.p. bending, <b>15</b>      | 326.5                          | 18.8                  | 329.5                                 | 328.8                                   | 3.4                                | CCO,CCN i.p. bend (82%)                                 |
| 37(1) | OH wagging                            | 254.5                          | 76.3                  | 294.9                                 | 254.3                                   | 93.9                               | HOCC torsion (96%)                                      |
| 38(1) | NH <sub>2</sub> torsion               | 237.0                          | 53.8                  | 245.8                                 | 244.6                                   | 18.5                               | HNCC torsion (97%)                                      |
| 39(1) | C-C-C o.p. bending, <b>11</b>         | -                              | -                     | 150.2                                 | 147.3                                   | 2.5                                | CCCC torsion (77%)                                      |

\* Tentative assignment of the observed experimental bands

\*\* NH<sub>2</sub> wagging fundamental 30(1) is expected to have the value of 30-60  $\text{cm}^{-1}$  according to aniline and halosubstituted anilines studies [3,4]

\*\*\* Theoretical intensities of overtone and combination bands were taken when available from anharmonic VPT2 treatment.

**Table S2.** The experimental and calculated wavenumbers of vibrational transitions of *trans* 2-aminophenol in the range of 220-800 cm<sup>-1</sup>. The theoretical results were obtained with B3LYP functional and aug-pc-2 basis set, within harmonic and anharmonic VPT2 [1] approaches. The assignments in bold are given according to Varsaniy's notation [2]. List of abbreviations used: i.p. – in plane, o.p. – out of plane.

| Mode  | Assignment                             | Experiment                     |                       | B3LYP/aug-pc-2                        |                                         |                        | Potential Energy Distribution                                   |
|-------|----------------------------------------|--------------------------------|-----------------------|---------------------------------------|-----------------------------------------|------------------------|-----------------------------------------------------------------|
|       |                                        | $\nu_{exp}$ , cm <sup>-1</sup> | Relative Intensity, % | harmonic wavenumber, cm <sup>-1</sup> | anharmonic wavenumber, cm <sup>-1</sup> | $I_{harm}$ , km/mol*** |                                                                 |
| 26(1) | ring breathing, <b>1</b>               | 767                            | 14.3                  | 778.3                                 | 768.0                                   | 5.7                    | HOC bend i.p. (20%), CC stretch (16%, 16%), CCC bend i.p. (16%) |
| 27(1) | C-H o.p. in phase, <b>11</b>           | 737.5                          | 100.0                 | 751.0                                 | 737.3                                   | 44.2                   | HCCC torsion (55%), CCCC torsion o.p. (25%)                     |
| 28(1) | Ring puckering, <b>4</b>               | 748.5                          | 49.3                  | 747.0                                 | 730.6                                   | 42.0                   | CCCC torsion o.p. (48%), HCCC torsion (33%)                     |
|       | NH <sub>2</sub> wagging overtone 0-3*  | 696                            | 17.1                  |                                       |                                         |                        |                                                                 |
|       | NH <sub>2</sub> torsion overtone 0-2*  | 653                            | 15.0                  | 693.7                                 | 664.8                                   | 1.0                    |                                                                 |
| 29(1) | C-C-C i.p. bending, <b>6a</b>          | 542                            | 9.3                   | 596.8                                 | 590.5                                   | 3.9                    | CCC bend i.p. (51%)                                             |
| 30(1) | NH <sub>2</sub> wagging fundamental**  | -                              | -                     | 586.4                                 | 526.6                                   | 58.3                   | HNCC torsion, CCN,CCO o.p. bend (66%)                           |
| 31(1) | C-C-C o.p. bending, <b>16a</b>         | 501.0                          | 15.0                  | 561.3                                 | 477.0                                   | 129.2                  | HNCC torsion, CCN,CCO o.p. bend (54%), CCC bend o.p. (10%)      |
| 32(1) | C-C-C in plane bending, <b>6b</b>      | 486                            | 11.8                  | 538.3                                 | 491.1                                   | 57.7                   | HNCC torsion (22%), CCC bend i.p. (19%)                         |
|       |                                        | 453                            | 9.3                   |                                       |                                         |                        |                                                                 |
| 33(1) | C-C-C out of plane bending, <b>16b</b> | 445.5                          | 57.1                  | 457.1                                 | 446.2                                   | 22.8                   | CCCC, CCCN, CCCO torsion o.p. (66%, 18%)                        |
|       |                                        | 437.0                          | 10.0                  |                                       |                                         |                        |                                                                 |
| 34(1) | C-N, C-O in plane bending, <b>9b</b>   | 351.0                          | 18.6                  | 446.0                                 | 441.1                                   | 2.7                    | CCO, CCN bend i.p. (68%)                                        |
| 35(1) | NH <sub>2</sub> torsion                | 323                            | 28.6                  | 346.8                                 | 339.3                                   | 21.5                   | HNCC torsion (83%)                                              |
| 36(1) | C-N, C-O i.p. bending, <b>15</b>       | 303                            | 20.0                  | 314.6                                 | 317.3                                   | 10.9                   | CCO,CCN,CCC bend i.p. (79%)                                     |
| 37(1) | OH wagging                             | 286.5                          | 17.9                  | 310.7                                 | 291.5                                   | 55.8                   | HOCC torsion (75%), CCCC torsion o.p. (13%)                     |
| 38(1) | C-N, C-O o.p. wagging, <b>10a</b>      | 256                            | 32.1                  | 278.1                                 | 274.0                                   | 48.0                   | CCCC,CCCO,CCCN torsion o.p. (59%, 17%), HOCC torsion (17%)      |
|       |                                        |                                |                       |                                       |                                         |                        |                                                                 |
| 39(1) | C-C-C o.p. bending, <b>10b</b>         | -                              | -                     | 184.2                                 | 184.2                                   | 1.6                    | CCCC torsion o.p. (80%)                                         |

\* Tentative assignment of the observed experimental bands

\*\* NH<sub>2</sub> wagging fundamental 30(1) is expected to have the value of 30-60 cm<sup>-1</sup> according to aniline and halosubstituted anilines studies [3,4]

\*\*\* Theoretical intensities of overtone and combination bands were taken when available from anharmonic VPT2 treatment

**Table S3.** The experimental and calculated wavenumbers of vibrational transitions of *trans* 3-aminophenol in the range of 220-800 cm<sup>-1</sup>. The theoretical results were obtained with B3LYP functional and aug-pc-2 basis set, within harmonic and anharmonic VPT2 [1] approaches. The assignments in bold are given according to Varsaniy's notation [2]. List of abbreviations used: i.p. – in plane, o.p. – out of plane.

| Mode  | Assignment                             | Experiment                     |                       | B3LYP/aug-pc-2                        |                                         |                        | Potential Energy Distribution                           |
|-------|----------------------------------------|--------------------------------|-----------------------|---------------------------------------|-----------------------------------------|------------------------|---------------------------------------------------------|
|       |                                        | $\nu_{exp}$ , cm <sup>-1</sup> | Relative Intensity, % | harmonic wavenumber, cm <sup>-1</sup> | anharmonic wavenumber, cm <sup>-1</sup> | $I_{harm}$ , km/mol*** |                                                         |
| 26(1) | C-H o.p. in phase, <b>11</b>           | 755                            | 100.0                 | 768.7                                 | 753.8                                   | 35.7                   | HCCO,HCCN,HCCC torsion o.p. (82%)                       |
| 27(1) | ring breathing, <b>1</b>               | 745                            | 24.3                  | 759.4                                 | 748.8                                   | 2.9                    | CC stretch (45%), CCC bend (22%,12%)                    |
|       | NH <sub>2</sub> wagging overtone 0-3*  | 715                            | 24.3                  |                                       |                                         |                        |                                                         |
|       | Comb. 39(1)+30(1)*                     | 698                            | 20.3                  |                                       |                                         |                        |                                                         |
| 28(1) | Ring puckering, <b>4</b>               | 678                            | 55.4                  | 698.7                                 | 685.3                                   | 29.2                   | CCCC torsion o.p. (76%)                                 |
| 29(1) | C-C-N, C-C-O o.p. bending, <b>16a</b>  | 612                            | 10.8                  | 636.2                                 | 607.4                                   | 18.1                   | CCCN,CCCO o.p. bend (82%)                               |
|       | Comb. 37(1)+36(1)*                     | 602                            | 23.0                  | 640.2                                 | 633.7                                   | 11.2                   |                                                         |
|       | Comb. 37(1)+38(1)*                     | 542                            | 10.8                  | 543.0                                 | 537.4                                   | 3.7                    |                                                         |
| 30(1) | C-C-C i.p. bending, <b>6a</b>          | 432                            | 9.5                   | 555.0                                 | 517.3                                   | 44.7                   | CCC bend i.p. (40%), HNCC torsion (19%)                 |
| 31(1) | C-C-C i.p. bending, <b>6b</b>          | 427                            | 29.7                  | 535.4                                 | 484.4                                   | 66.0                   | CCC bend i.p. (56%), HNCC torsion (18%)                 |
|       | NH <sub>2</sub> wagging overtone 0-2*  | 419                            | 67.6                  |                                       |                                         |                        |                                                         |
| 32(1) | NH <sub>2</sub> wagging**              | -                              | -                     | 525.9                                 | 426.3                                   | 156.8                  | HNCC torsion (43%), CCC bend (15%), NC,OC stretch (10%) |
| 33(1) | C-C-C out of plane bending, <b>16b</b> | 459                            | 24.3                  | 465.4                                 | 463.8                                   | 4.1                    | CCCC torsion o.p. (64%), CCC,CCN,CCO bend (17%)         |
| 34(1) | C-N, C-O in plane bending, <b>15</b>   | 449                            | 12.2                  | 462.3                                 | 449.8                                   | 19.8                   | CCC,CCN,CCO bend i.p. (68%), CCCC torsion o.p. (11%)    |
|       | 39(2), <b>10b</b> overtone*            | 409                            | 5.4                   |                                       |                                         |                        |                                                         |
|       | 37(1)+32(1)***                         | 385                            | 6.8                   |                                       |                                         |                        |                                                         |
| 35(1) | OH wagging                             | 316                            | 74.3                  | 355.9                                 | 328.1                                   | 88.9                   | HOCC torsion (95%)                                      |
| 36(1) | C-N, C-O i.p. bending, <b>9a</b>       | 325                            | 14.9                  | 328.1                                 | 324.3                                   | 2.0                    | CCN,CCO bend i.p. (49%), HNCC torsion (31%)             |
| 37(1) | NH <sub>2</sub> torsion                | 329                            | 21.6                  | 312.1                                 | 312.8                                   | 19.8                   | HNCC torsion (59%), CCN,CCO bend i.p. (27%)             |
|       | 37(1)-32(1)***                         | 274                            | 10.3                  |                                       |                                         |                        |                                                         |
|       | 35(1)-32(1)***                         | 262                            | 14.8                  |                                       |                                         |                        |                                                         |
| 38(1) | C-C-C o.p. bending, <b>10a</b>         | -                              | -                     | 230.8                                 | 224.7                                   | 0.6                    | CCCC torsion o.p. (80%)                                 |
| 39(1) | C-C-C o.p. bending, <b>10b</b>         | -                              | -                     | 217.9                                 | 212.9                                   | 12.9                   | CCCC,CCCN,CCCO torsion o.p. (79%,10%)                   |

\* Tentative assignment of the observed experimental bands

\*\* NH<sub>2</sub> wagging fundamental 32(1) is expected to have the value of 30-60 cm<sup>-1</sup> according to aniline and halosubstituted anilines studies [3,4]. Our estimation for *trans* 3-aminophenol is ~55 cm<sup>-1</sup> obtained from the tentatively assigned combination bands 262, 274 and 385 cm<sup>-1</sup> (sum and difference frequency)

\*\*\* Theoretical intensities of overtone and combination bands were taken when available from anharmonic VPT2 treatment

**Table S4.** The experimental and calculated wavenumbers of vibrational transitions of *cis* 3-aminophenol in the range of 220-800 cm<sup>-1</sup>. The theoretical results were obtained with B3LYP functional and aug-pc-2 basis set, within harmonic and anharmonic VPT2 [1] approaches. The assignments in bold are given according to Varsaniy's notation [2]. List of abbreviations used: i.p. – in plane, o.p. – out of plane.

| Mode  | Assignment                             | Experiment                     |                       | B3LYP/aug-pc-2                        |                                         |                        | Potential Energy Distribution                                    |
|-------|----------------------------------------|--------------------------------|-----------------------|---------------------------------------|-----------------------------------------|------------------------|------------------------------------------------------------------|
|       |                                        | $\nu_{exp}$ , cm <sup>-1</sup> | Relative Intensity, % | harmonic wavenumber, cm <sup>-1</sup> | anharmonic wavenumber, cm <sup>-1</sup> | $I_{harm}$ , km/mol*** |                                                                  |
| 26(1) | C-H o.p. in phase, <b>11</b>           | 766                            | 100.0                 | 776.7                                 | 760.5                                   | 20.8                   | HCCN,HCCO,HCCC torsion o.p. (91%)                                |
| 27(1) | ring breathing, <b>1</b>               | 748                            | 43.1                  | 762.0                                 | 750.0                                   | 5.3                    | CCC bend (41%,17%), CC stretch (18%), NC,OC stretch (10%)        |
|       | NH <sub>2</sub> wagging overtone 0-3*  | 717                            | 37.9                  |                                       |                                         |                        |                                                                  |
|       | Comb. 38(1)+33(1)*                     | 700                            | 44.8                  |                                       |                                         |                        |                                                                  |
| 28(1) | Ring puckering, <b>4</b>               | 679.5                          | 72.4                  | 698.7                                 | 685.6                                   | 25.1                   | CCCC torsion o.p. (71%), HCCN torsion (15%)                      |
| 29(1) | C-C-N, C-C-O o.p. bending, <b>16a</b>  | 604                            | 17.2                  | 635.8                                 | 604.3                                   | 17.5                   | CCCN,CCCO torsion o.p. (86%)                                     |
|       | Comb. 37(1)+36(1)*                     | 580                            | 31.9                  |                                       |                                         |                        |                                                                  |
| 30(1) | NH <sub>2</sub> wagging*               | -                              | -                     | 557.4                                 | 481.0                                   | 112.6                  | HNCC torsion (40%), CCC bend (13%,10%)                           |
| 31(1) | C-C-C i.p. bending, <b>6a</b>          | 434                            | 32.8                  | 540.4                                 | 468.2                                   | 98.5                   | CCC bend i.p. (12%,13%), NC,OC stretch (11%), HNCC torsion (30%) |
| 32(1) | C-C-C i.p. bending, <b>6b</b>          | 430                            | 50.0                  | 529.4                                 | 500.2                                   | 51.7                   | CCC bend i.p. (59%), NC,OC stretch (13%)                         |
|       | NH <sub>2</sub> wagging overtone 0-2*  | 422                            | 84.5                  |                                       |                                         |                        |                                                                  |
| 33(1) | C-N, C-O in plane bending, <b>15</b>   | 461                            | 27.6                  | 467.2                                 | 465.6                                   | 13.8                   | CCC,CCN,CCO bend i.p. (83%)                                      |
| 34(1) | C-C-C out of plane bending, <b>16b</b> | 446                            | 43.1                  | 460.2                                 | 451.1                                   | 28.1                   | CCCC,CCCN,CCCO torsion o.p. (75%)                                |
|       | 35(1)+32(1)***                         | 348                            | 17.2                  |                                       |                                         |                        |                                                                  |
| 35(1) | OH wagging                             | 307                            | 124.1                 | 348.3                                 | 317.2                                   | 90.0                   | HOCC torsion (95%)                                               |
| 36(1) | C-N, C-O i.p. bending, <b>9a</b>       | 312                            | 20.7                  | 323.9                                 | 321.2                                   | 4.8                    | CCN,CCO bend i.p. (66%), CC stretch (11%)                        |
| 37(1) | NH <sub>2</sub> torsion                | 318.5                          | 29.3                  | 301.7                                 | 299.7                                   | 14.0                   | HNCC torsion 86%                                                 |
|       | 37(1)-32(1)***                         | 268                            | 19.0                  |                                       |                                         |                        |                                                                  |
|       | 35(1)-32(1)***                         | 256                            | 23.4                  |                                       |                                         |                        |                                                                  |
| 38(1) | C-C-C o.p. bending, <b>10a</b>         | -                              | -                     | 230.0                                 | 223.8                                   | 1.3                    | CCCC torsion o.p. (84%)                                          |
| 39(1) | C-C-C o.p. bending, <b>10b</b>         | -                              | -                     | 218.9                                 | 214.0                                   | 4.5                    | CCCC,CCCN,CCCO torsion o.p. (83%)                                |

\* Tentative assignment of the observed experimental bands

\*\* NH<sub>2</sub> wagging fundamental 30(1) is expected to have the value of 30-60 cm<sup>-1</sup> according to aniline and halosubstituted anilines studies [3,4]. Our estimation for *cis* 3-aminophenol is ~50 cm<sup>-1</sup>, and was obtained from the tentatively assigned combination bands 256, 268 and 348 cm<sup>-1</sup> (sum and difference frequency)

\*\*\* Theoretical intensities of overtone and combination bands were taken when available from anharmonic VPT2 treatment

Fig. FS1. Comparison between the accuracy of calculated fundamental transitions in the high wavenumber region (800-4000  $\text{cm}^{-1}$ ) with respect to experimental data, achieved by different GGA and hybrid functionals with 6-311+G(d,p) basis set. The root mean square (RMS) errors were calculated based on 50 unequivocally assigned mid-IR fundamental transitions from literature data for the studied aminophenol isomers.

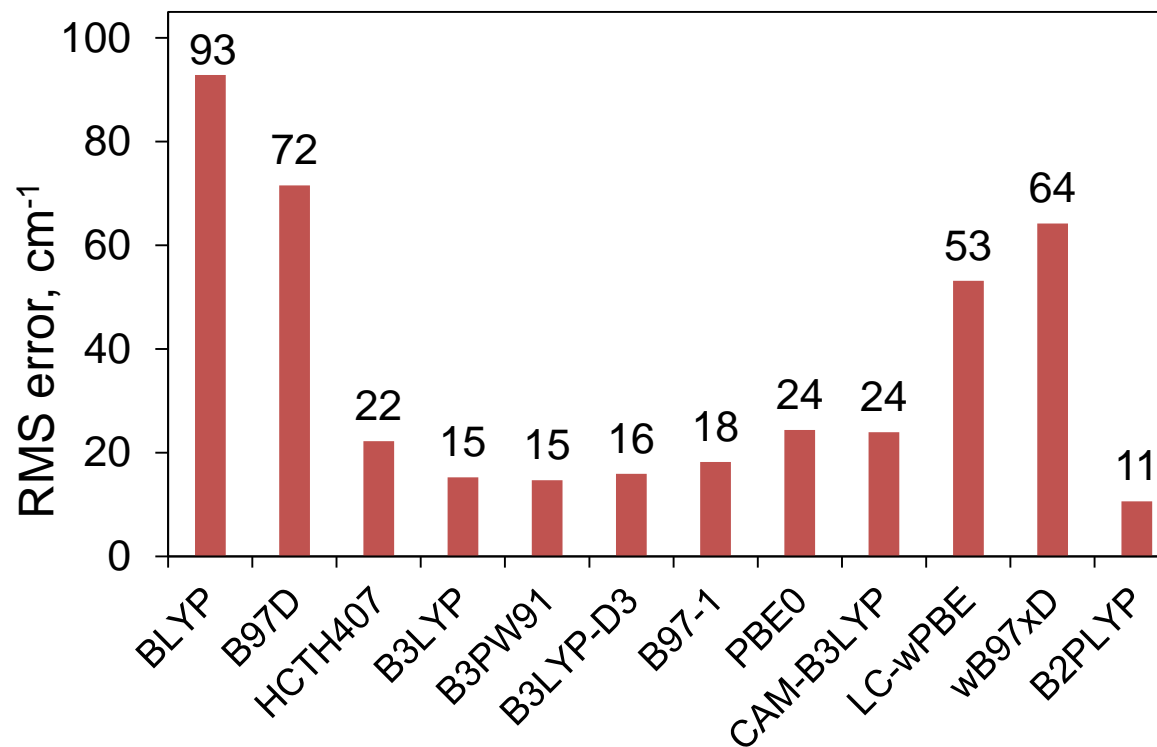

References:

1. V. Barone, M. Biczysko and J. Bloino, *Phys. Chem. Chem. Phys.*, 2014, **16**, 1759–1787.
2. G. Varsanyi, *Vibrational Spectra of Benzene Derivatives*, edited by G. Varsanyi, Academic Press, 1969.
3. R. A. Kydd and P. J. Krueger, *Chem. Phys. Letters*, 1977, **49**(3), 539.
4. R. A. Kydd and P. J. Krueger, *J. Chem. Phys.*, 1978, **69**(2), 827.
